# Supplementary material
Source: PubMed Central journal article supplement (PMC9216696)
Supplement: mmc1.pdf [file mmc1.pdf]

# Microbial Prevalence of commonly submitted samples

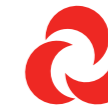

The Aga Khan University Hospital

Department of Pathology

## ANTIBIOTIC SUSCEPTIBILITY REPORT 2020

FOR DATA FROM  
OCTOBER 2019 - JUNE 2020

The organisms and resistance patterns have significant limitations, including: antibiotics before cultures, patients with recurrent infections, which patients have cultures ordered, and are of limited value for guiding empiric therapy.

For more information please contact  
Department of Pathology  
Tel: +254 20 366 2231/48  
Email: [pathology.department@aku.edu](mailto:pathology.department@aku.edu)  
Website: [www.aku.edu/akuhn](http://www.aku.edu/akuhn)

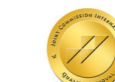

The first hospital in Kenya Accredited by  
Joint Commission International, USA

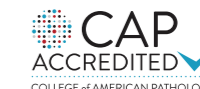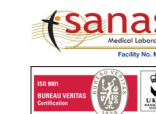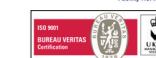

### Sputum (2019-2020; n=58)

| Organism                 | N  | %   |
|--------------------------|----|-----|
| Klebsiella pneumoniae    | 18 | 31% |
| Staphylococcus aureus    | 12 | 21% |
| Pseudomonas aeruginosa   | 6  | 10% |
| Streptococcus pneumoniae | 6  | 10% |
| Escherichia coli         | 5  | 9%  |

### CSF 2019-2020 (n=48)

| Organism           | N  | %   |
|--------------------|----|-----|
| Crypto.neoformans  | 19 | 40% |
| Cons               | 11 | 23% |
| K.pneum.pneumoniae | 5  | 10% |
| Esch.coli          | 4  | 8%  |
| Ps.aeruginosa      | 3  | 6%  |
| viridans strep     | 2  | 4%  |
| Staph.aureus       | 2  | 4%  |

### Urine OP 2019-2020 (n=1736)

| Organism                     | N    | %   |
|------------------------------|------|-----|
| Escherichia coli             | 1215 | 70% |
| Klebsiella pneumoniae        | 151  | 9%  |
| Staphylococcus saprophyticus | 84   | 5%  |
| Enterococcus faecalis        | 58   | 3%  |
| Proteus mirabilis            | 19   | 1%  |
| Streptococcus agalactiae     | 19   | 1%  |
| Enterobacter cloacae         | 16   | 1%  |
| Pseudomonas aeruginosa       | 10   | 1%  |
| Staphylococcus aureus        | 10   | 1%  |

### Abscess aspirate (2019-2020; n=134)

| Organism              | N  | %   |
|-----------------------|----|-----|
| Staphylococcus aureus | 84 | 63% |
| Escherichia coli      | 26 | 19% |

### Stool (2019-2020; n=477)

| Organism                   | N   | %   |
|----------------------------|-----|-----|
| Salmonella spp             | 255 | 53% |
| Shigella spp               | 121 | 25% |
| Vibrio cholerae            | 69  | 14% |
| EPEC                       | 21  | 4%  |
| Salmonella Typhi/Paratyphi | 11  | 2%  |

### Trach Asp Critical Care (2019-2020; n=231)

| Organism                          | N  | %   |
|-----------------------------------|----|-----|
| Pseudomonas aeruginosa            | 65 | 28% |
| Klebsiella pneumoniae ssp ozaenae | 53 | 23% |
| Acinetobacter baumannii           | 30 | 13% |
| Staphylococcus aureus             | 19 | 8%  |
| Escherichia coli                  | 18 | 8%  |
| Stenotrophomonas maltophilia      | 13 | 6%  |
| Enterobacter cloacae complex      | 7  | 3%  |

### Bloodstream infections (BSI) (2019-2020; n=485)

| Organism                | N   | %   |
|-------------------------|-----|-----|
| Esch.coli               | 129 | 27% |
| Candida species         | 69  | 14% |
| K.pneum.pneumoniae      | 64  | 13% |
| Staph.aureus            | 45  | 9%  |
| Entero.faecalis         | 26  | 5%  |
| Salm.Typhi              | 19  | 4%  |
| Ps.aeruginosa           | 17  | 4%  |
| Entero.faecium          | 16  | 3%  |
| nontyphoidal Salmonella | 11  | 2%  |
| Str.pneumoniae          | 11  | 2%  |
| Crypto.neoformans       | 9   | 2%  |
| Str.mitis/oralis        | 8   | 2%  |
| Aci.baumannii           | 7   | 1%  |
| K.oxytoca               | 7   | 1%  |
| Ent.cloacae complex     | 6   | 1%  |
| Str.agalactiae          | 6   | 1%  |

### Neonatal bloodstream infections (BSI) 2019-2020

| Organism                 | <=3d (69) | 4-7d (31) | 8-30d (84) | All |
|--------------------------|-----------|-----------|------------|-----|
| Klebsiella pneumoniae    | 3         | 14        | 35         | 52  |
| Enterococcus species     | 13        | 4         | 13         | 30  |
| Streptococcus other      | 18        | 2         | 2          | 22  |
| Streptococcus agalactiae | 18        | 0         | 1          | 19  |
| Escherichia coli         | 6         | 6         | 5          | 17  |
| Staphylococcus aureus    | 4         | 0         | 6          | 10  |
| Candida species          | 1         | 1         | 7          | 9   |
| Enterobacter cloacae     | 1         | 2         | 6          | 9   |
| Acinetobacter baumannii  | 1         | 0         | 3          | 4   |
| Pseudomonas aeruginosa   | 0         | 1         | 2          | 3   |
| Streptococcus pneumoniae | 1         | 0         | 1          | 2   |
| Serratia marcescens      | 0         | 0         | 2          | 2   |
| Burkholderia cepacia     | 0         | 1         | 0          | 1   |
| Clostridium bifermentans | 1         | 0         | 0          | 1   |
| Corynebacterium jeikeium | 1         | 0         | 0          | 1   |
| Listeria monocytogenes   | 1         | 0         | 0          | 1   |
| Streptococcus pyogenes   | 0         | 0         | 1          | 1   |

# Susceptibilities

| GNR 2019-2020                |      |      |     |                 |       |         |        |         |       |      |      |      |          |         |
|------------------------------|------|------|-----|-----------------|-------|---------|--------|---------|-------|------|------|------|----------|---------|
| GNR                          | N    | Amik | Amp | Amox/Clav (A/C) | Cefep | Cefotax | Ceftaz | Cefurox | Cipro | Gent | Mero | Ntfn | PipT/azo | TMP/SMX |
| Acinetobacter baumannii      | 77   |      |     |                 | 31%   |         | 22%    |         | 35%   | 43%  | 35%  |      |          | 32%     |
| Enterobacter cloacae         | 50   | 94%  |     |                 |       |         |        |         | 88%   | 86%  | 96%  |      | 80%      | 80%     |
| Escherichia coli             | 1058 | 93%  | 19% | 71%             |       | 65%     |        | 62%     | 63%   | 84%  | 99%  | 90%  | 90%      | 27%     |
| Klebsiella pneumoniae        | 226  | 92%  |     | 63%             |       | 57%     |        | 56%     | 74%   | 56%  | 93%  |      | 71%      | 47%     |
| Proteus mirabilis            | 45   | 96%  | 38% | 87%             |       | 91%     |        | 87%     | 87%   | 78%  | 96%  |      | 98%      | 31%     |
| Pseudomonas aeruginosa       | 92   | 87%  |     |                 | 78%   |         | 78%    |         | 85%   | 87%  | 85%  |      | 81%      |         |
| Serratia marcescens          | 34   | 97%  |     |                 |       | 94%     |        |         | 100%  | 85%  | 97%  |      |          | 97%     |
| Stenotrophomonas maltophilia | 47   |      |     |                 |       |         |        |         |       |      |      |      |          | 89%     |
| OP Urine                     |      |      |     |                 |       |         |        |         |       |      |      |      |          |         |
| Escherichia coli             | 736  | 94%  | 21% | 75%             |       | 73%     |        | 70%     | 71%   | 85%  | 100% | 92%  | 93%      | 28%     |
| Klebsiella pneumoniae        | 77   | 96%  |     | 71%             |       | 71%     |        | 70%     | 87%   | 88%  | 96%  |      | 78%      | 48%     |

| GPC                      | N   | Amp | Ceftriax | Clinda | Clinda for MRSA | Gentsyn | Strepsyn | Levoflox | Linez | Ox  | Pen | Penmen | SMX/TMP | Teico | Tetra | Tige | Vanco |
|--------------------------|-----|-----|----------|--------|-----------------|---------|----------|----------|-------|-----|-----|--------|---------|-------|-------|------|-------|
| Enterococcus faecalis    | 81  | 99% |          |        |                 | 70%     | 80%      |          |       |     |     |        |         |       |       |      | 99%   |
| Enterococcus faecium     | 52  | 8%  |          |        |                 | 48%     | 42%      |          | 94%   |     |     |        |         |       |       |      | 81%   |
| Staphylococcus aureus    | 265 |     |          | 88%    | 71%             |         |          | 92%      | 100%  | 82% | 14% |        | 42%     | 99%   | 83%   | 100% | 100%  |
| Streptococcus pneumoniae | 35  |     | 91%      | 65%    |                 |         |          | 91%      |       |     | 83% | 20%    | 14%     |       | 34%   |      | 97%   |

| Outpatient urine isolates |         |      |     |           |          |       |            |            |            |          |           |         |
|---------------------------|---------|------|-----|-----------|----------|-------|------------|------------|------------|----------|-----------|---------|
| Organism                  | Year    | N    | Amp | Amox/clav | Amikacin | Cipro | Cefotaxime | Cefuroxime | Gentamicin | Nitrofur | Meropenem | TMP/SMX |
| E. coli                   | 2012-17 | 4442 | 22% | 68%       | 100%     | 67%   | 80%        | 75%        | 85%        | 87%      | 100%      | 25%     |
|                           | 2012    | 1062 | 20% | 66%       | 100%     | 68%   | 83%        | 78%        | 84%        | 86%      | 100%      | 24%     |
|                           | 2013    | 920  | 21% | 68%       | 100%     | 66%   | 80%        | 68%        | 83%        | 86%      | 100%      | 25%     |
|                           | 2014    | 942  | 22% | 68%       | 100%     | 66%   | 79%        | 74%        | 85%        | 86%      | 100%      | 23%     |
|                           | 2015    | 783  | 23% | 66%       | 100%     | 66%   | 77%        | 73%        | 85%        | 86%      | 100%      | 25%     |
|                           | 2016    | 735  | 22% | 73%       | 99%      | 68%   | 79%        | 74%        | 87%        | 93%      | 100%      | 29%     |
|                           | 2017    | 348  | 20% | 69%       | 99%      | 65%   | 71%        | 71%        | 84%        | 95%      | 99%       | 25%     |
|                           | 2018-19 | 459  | 20% | 65%       | 97%      | 70%   | 71%        | 68%        | 93%        | 93%      | 100%      | 28%     |
| K. pneumo                 | All     | 5249 | 21% | 68%       | 99%      | 67%   | 78%        | 73%        | 85%        | 88%      | 100%      | 25%     |
|                           | 2012-17 | 618  |     | 53%       | 98%      | 78%   | 63%        | 59%        | 74%        | 19%      | 97%       | 41%     |
|                           | 2012    | 139  |     | 56%       | 99%      | 85%   | 73%        | 70%        | 80%        | 12%      | 99%       | 40%     |
|                           | 2013    | 128  |     | 50%       | 99%      | 77%   | 62%        | 57%        | 68%        | 11%      | 98%       | 44%     |
|                           | 2014    | 109  |     | 53%       | 100%     | 78%   | 66%        | 63%        | 75%        | 22%      | 99%       | 45%     |
|                           | 2015    | 124  |     | 49%       | 93%      | 69%   | 52%        | 49%        | 68%        | 12%      | 92%       | 34%     |
| 2016                      | 118     |      |     | 54%       | 98%      | 79%   | 63%        | 56%        | 78%        | 41%      | 97%       | 42%     |

| Organism | Year    | N   | Amp | Amox/clav | Amikacin | Cipro | Cefotaxime | Cefuroxime | Gentamicin | Nitrofur | Meropenem | TMP/SMX |
|----------|---------|-----|-----|-----------|----------|-------|------------|------------|------------|----------|-----------|---------|
|          | 2017    | 31  |     | 55%       | 97%      | 61%   | 42%        |            | 74%        | 29%      | 90%       | 55%     |
|          | 2018-19 | 60  |     | 43%       | 95%      | 72%   | 52%        | 50%        | 70%        | 15%      | 95%       | 43%     |
|          | All     | 709 |     | 52%       | 97%      | 76%   | 61%        | 58%        | 73%        | 19%      | 97%       | 42%     |

| Organism      | Year    | N   | Penicillin | Cetotax | Levo | Tetra | TMP/SMX | Eryth |
|---------------|---------|-----|------------|---------|------|-------|---------|-------|
| S. pneumoniae | 2018-19 | 15* | 40%        | 93%     | 93%  | 20%   | 13%     | 33%   |

| Organism    | Year    | N   | Penicillin | Vanco | Gent synergy | Strep synergy | Gent or Strep synergy |
|-------------|---------|-----|------------|-------|--------------|---------------|-----------------------|
| E. faecalis | 2018-19 | 44  | 98%        | 100%  | 61%          | 75%           | 86%                   |
| E. faecium  | 2018-19 | 16* | 13%        | 88%   | 50%          | 31%           | 63%                   |

| Staphylococcus aureus susceptibility 2011-2019 |         |         |     |     |        |      |       |      |       |       |
|------------------------------------------------|---------|---------|-----|-----|--------|------|-------|------|-------|-------|
| Source                                         | Years   | N       | Pen | Ox  | Clinda | Levo | Vanco | Rif  | Tetra | TM/SX |
| Blood                                          | 2011-16 | 136     | 11% | 90% | 83%    | 88%  | 99%   | 99%  | 83%   | 58%   |
|                                                | All     | 1645    | 11% | 94% | 88%    | 92%  | 99%   | 98%  | 85%   | 52%   |
| All                                            | 2012    | 299     | 1%  | 96% | 89%    | 92%  | 100%  | 99%  | 85%   | 59%   |
|                                                | 2013    | 313     | 11% | 95% | 90%    | 94%  | 99%   | 99%  | 84%   | 59%   |
| All                                            | 2014    | 309     | 11% | 95% | 89%    | 94%  | 99%   | 98%  | 83%   | 58%   |
|                                                | 2015    | 359     | 14% | 95% | 86%    | 93%  | 99%   | 98%  | 86%   | 50%   |
| All                                            | 2016    | 365     | 10% | 92% | 84%    | 90%  | 100%  | 96%  | 85%   | 38%   |
|                                                | 2017    | 103     | 16% | 88% | 80%    | 100% | 100%  | 100% | 89%   | 52%   |
| All                                            | 2018-19 | 209     | 14% | 83% | 84%    | 91%  | 100%  | 100% | 87%   | 48%   |
|                                                | MRSA    | 2018-19 | 36  | 0%  | 0%     | 67%  | 67%   | 100% | 100%  | 67%   |

- NOTES:**
- Trends in susceptibility rates: for organisms with large annual numbers, susceptibility can be tracked over time. Overall, there have been few trends since 2012. However, the MRSA rate for S. aureus may be increasing (17% of S. aureus for 2018-19 although only 5% of blood isolates were MRSA. For Klebsiella pneumoniae, resistance rates for cephalosporins and carbapenems appear to be increasing.
  - Trends in prevalence rates: The biggest recent trend is the appearance of Vibrio cholerae in 2017; since then, it has remained endemic in Nairobi.
  - The susceptibility rates for cetotaxime are the same as for other third generation cephalosporins (except pseudomonas).
  - The susceptibility rates for ceturoxime are the same as for other second generation cephalosporins.

\*Accuracy is reduced for organisms with fewer than 30 samples.

| Abbreviation        | Meaning                 | Abbreviation        | Meaning                 | The numbers are listed as % susceptible |                      |
|---------------------|-------------------------|---------------------|-------------------------|-----------------------------------------|----------------------|
| CO                  | community onset         | HO                  | hospital onset          |                                         |                      |
| <b>Abbreviation</b> | <b>Drug</b>             | <b>Abbreviation</b> | <b>Drug</b>             | <b>Abbreviation</b>                     | <b>Drug</b>          |
| Amp                 | ampicillin              | Ntfn                | nitrofurantoin          | Tetra                                   | tetracycline         |
| Amox/Clav (A/C)     | amoxicillin/clavulanate | Gent                | gentamicin              | Eryth                                   | erythromycin         |
| Amik                | amikacin                | Mero                | meropenem               | Vanco                                   | vancomycin           |
| Cipro               | ciprofloxacin           | TMP/SMX             | trimethoprim/sulfa      | Gent syn                                | gentamicin synergy   |
| Cefotax             | cefotaxime              | Cefep               | cefepime                | Strep synergy                           | streptomycin synergy |
| Cefurox             | cefuroxime              | Pip/Tazo            | piperacillin/tazobactam |                                         |                      |
| Ceftaz              | ceftazidime             | Ox                  | oxacillin               |                                         |                      |
